# Supplementary material for: Molecular mechanism of targeted inhibition of HMGA2 via miRNAlet-7a in proliferation and metastasis of laryngeal squamous cell carcinoma
Source: Oxford University Press journal article supplement (doi:10.1042/bsr20193788), 2020-05-20
Supplement: bsr-2019-3788_supp.pdf [file bsr-2019-3788_supp.pdf]

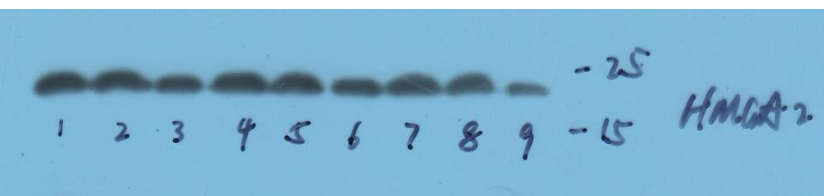

HMGA2-1

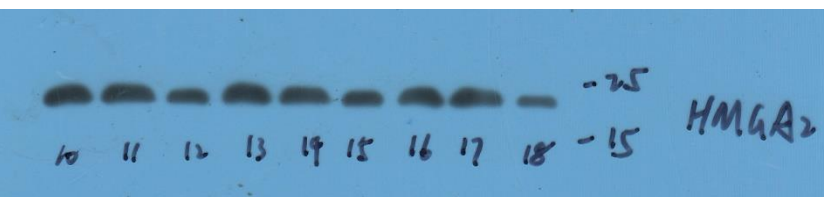

HMGA2-2

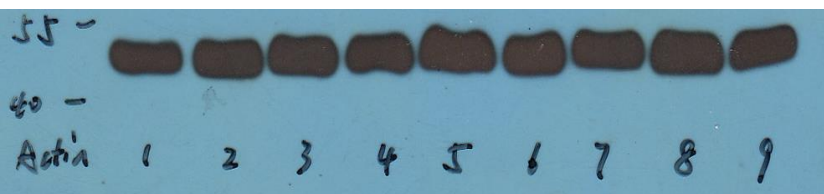

$\beta$ -actin-1

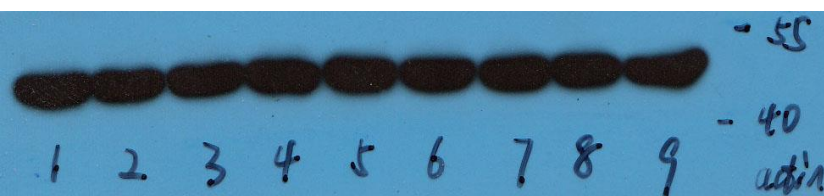

$\beta$ -actin-2

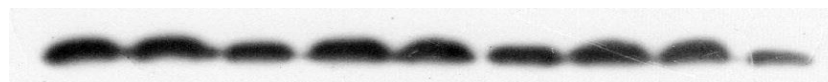

HMGA2-1

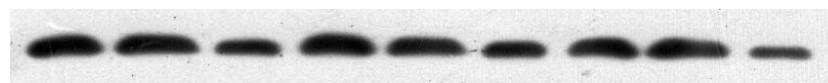

HMGA2-1

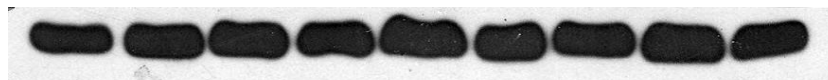

$\beta$ -actin-1

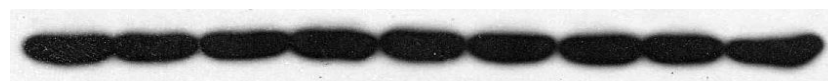

$\beta$ -actin-2
